# Supplementary material for: rahu is a mutant allele of Dnmt3c, encoding a DNA methyltransferase homolog required for meiosis and transposon repression in the mouse male germline
Source: PLoS Genet. 2017 Aug 30;13(8):e1006964. doi: 10.1371/journal.pgen.1006964 (PMC5607212; doi:10.1371/journal.pgen.1006964)
Supplement: S5 Table — (XLSX) [file pgen.1006964.s005.xlsx]

## Sheet: S5
Supporting Information
S5 Table. Dot plot sequence coordinates (bp).
Organism	Sequence source	Chromosome/Scaffold/Contig	Commd7				Dnmt3b				Dnmt3c				Mapre1
			Name	Start/End	End/Start		Name	Start/End	End/Start		Name	Start/End	End/Start		Name	Start/End	End/Start
Mouse	Ensembl	Chr2	Commd7-001	153616933	153632781		Dmnt3b-001	153649453	153687730		Gm14490	153696652	153729907		Mapre1-001	153741274	153773310
Rat	Ensembl	Chr3	Commd7-201	149101243	149115209		Dmnt3b-201	149144795	149168760		Dnmt3cb	149180544	149212906		Mapre1-201	149221377	149249273
Chinese Hamstera	UCSC	KE379255	COMMD7	958019											MAPRE1		1110272
Squirrel	Ensembl	JH393295.1	COMMD7	19499191	19510898		DNMT3B	19547836	19569349						ENSSTOG00000006699	19577854	19606345
Guinea Pig	Ensembl	scaffold_8	COMMD7	549664	524809		DNMT3B	476117	459401						ENSCPOG00000023542	446322	427574
Rabbit	Ensembl	Chr4	COMMD7	6711815	6660320		DNMT3B	6648882	6631098						MAPRE1	6619149	6599525
Human	Ensembl	Chr20	COMMD7-001	32702691	32743997		DNMT3B-001	32762385	32809356						MAPRE1-001	32819893	32850405
			Start of aligned sequencec												End of aligned sequencec
Prairie Vole	BLAST/NCBI	LG8	26270856												26415157
Blind Mole Rat	BLAST/NCBI	scaffold1357_NW_008339987	291676												465214
Jerboa	BLAST/NCBI	scaffold00109_NW_004504421	4658333												4798733
Beaver	BLAST/NCBI	scaffold_3671_MTKA01003671	122006												47586
Kangaroo Rat	BLAST/NCBI	Scaffold13_NW_012267229	13982086												14085608
aChinese hamster coordinates were inferred from UCSC genomic alignment to the coding boundaries of mouse Commd7 and Mapre1 transcripts
bPutative Dnmt3c coordinates were inferred from genomic alignment to mouse Gm14490
cSequence coordinates were obtained by BLAST of mouse sequence to genome
